# Supplementary material for: Chronic exposure to neonicotinoids increases neuronal vulnerability to mitochondrial dysfunction in the bumblebee (Bombus terrestris)
Source: PubMed Central journal article supplement (PMC4415021; doi:10.1096/fj.14-267179), 2015-01-29

25th APRIL 2014- 11th JUNE 2014

28th JUNE 2014 - 9th AUGUST 2014

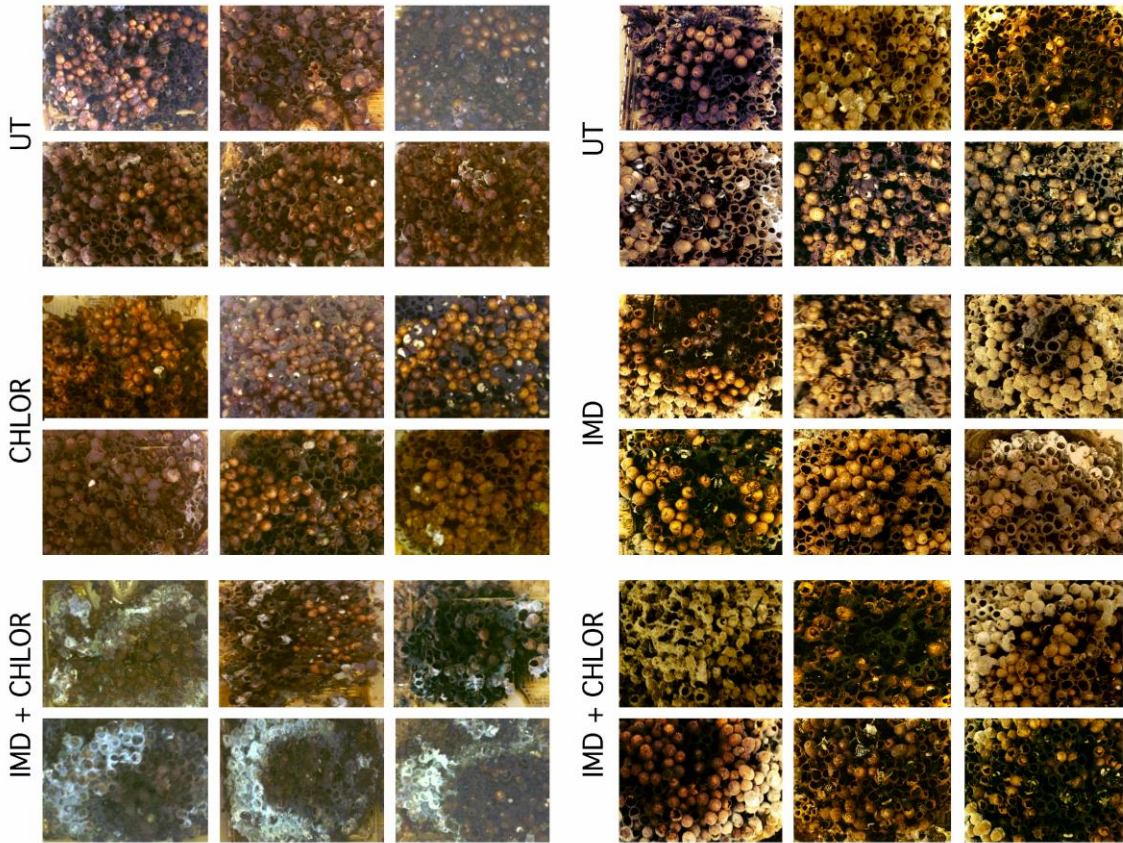

Supplement: supp_fj.14-267179_Supplemental_Figure2.pdf [file supp_fj.14-267179_Supplemental_Figure2.pdf]
